# Supplementary material for: Shelf life and time-resolved thermal, chemical, and thermodynamic characterization of four hydrophobic deep eutectic solvents
Source: Royal Society of Chemistry journal article supplement (doi:10.1039/d6ra01239f), 2026-05-07
Supplement: d6ra01239f1.pdf [file d6ra01239f1.pdf]

## SUPPLEMENTARY

### THYMOL:DECANOIC ACID DES

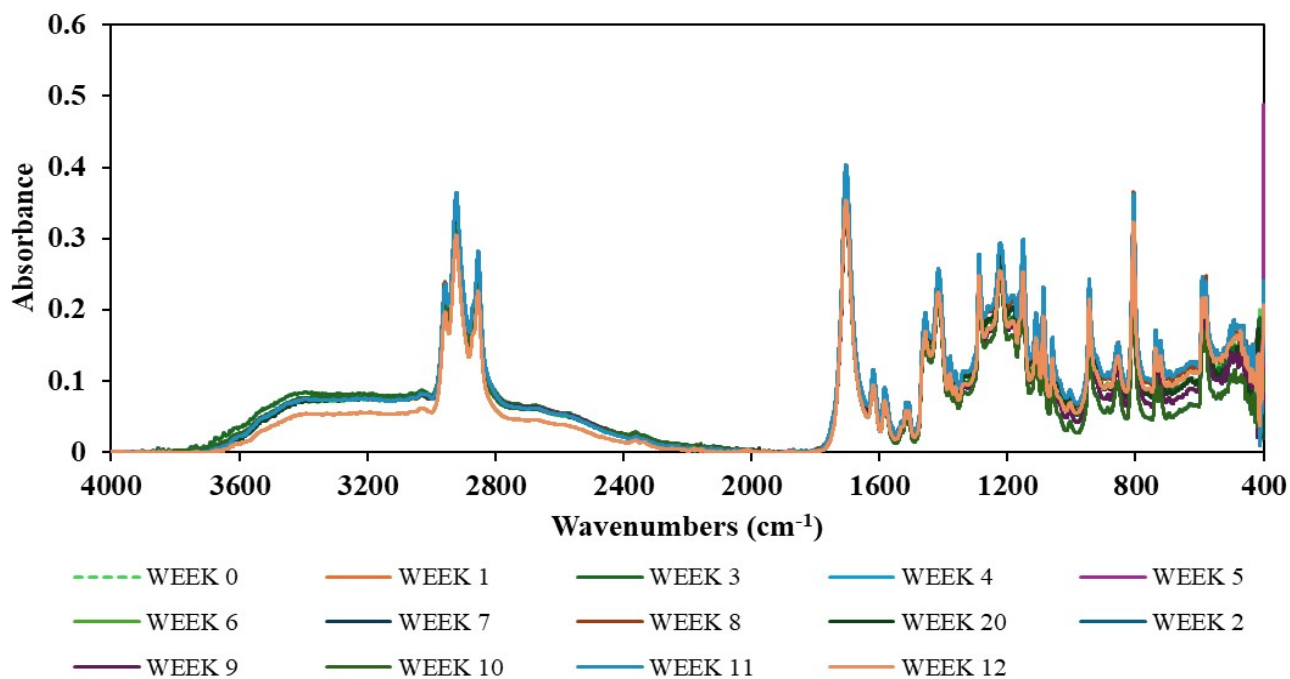

Figure S1(i) – FT-IR for thymol: Decanoic acid (Week 1-12 and week 20)

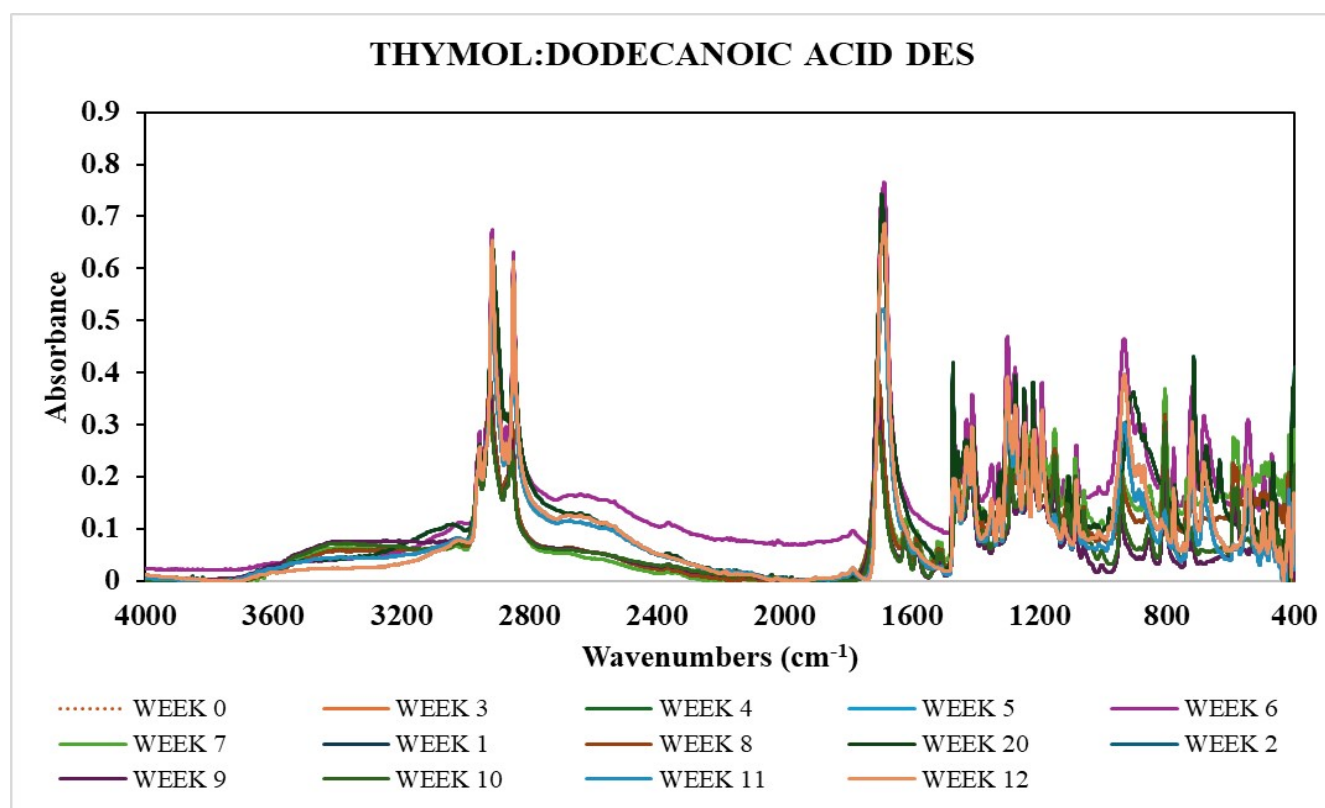

Figure S1(ii) – FT-IR for thymol: Dodecanoic acid (Week 1-12 and week 20)

### TOAB:DECANOIC ACID DES

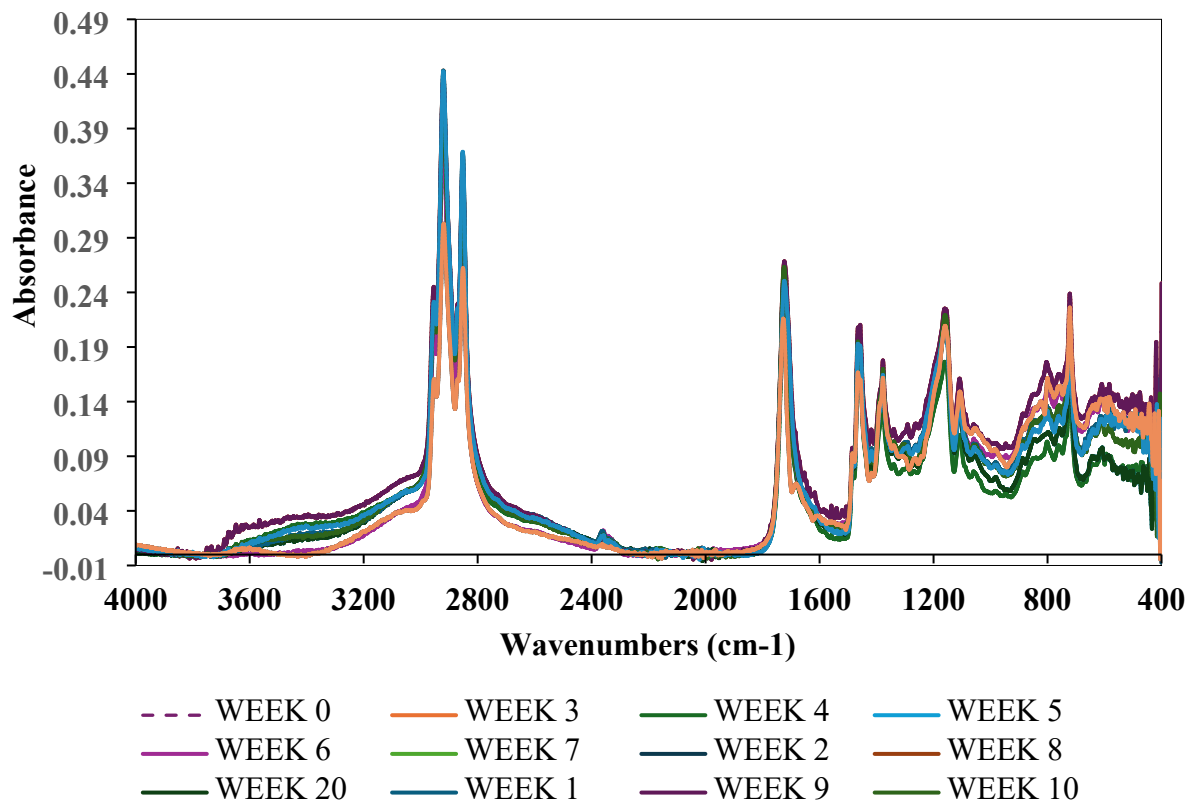

Figure S1(iii) – FT-IR for TOAB: Decanoic acid (Week 1-12 and week 20)

### TOAB:DODECANOIC ACID DES

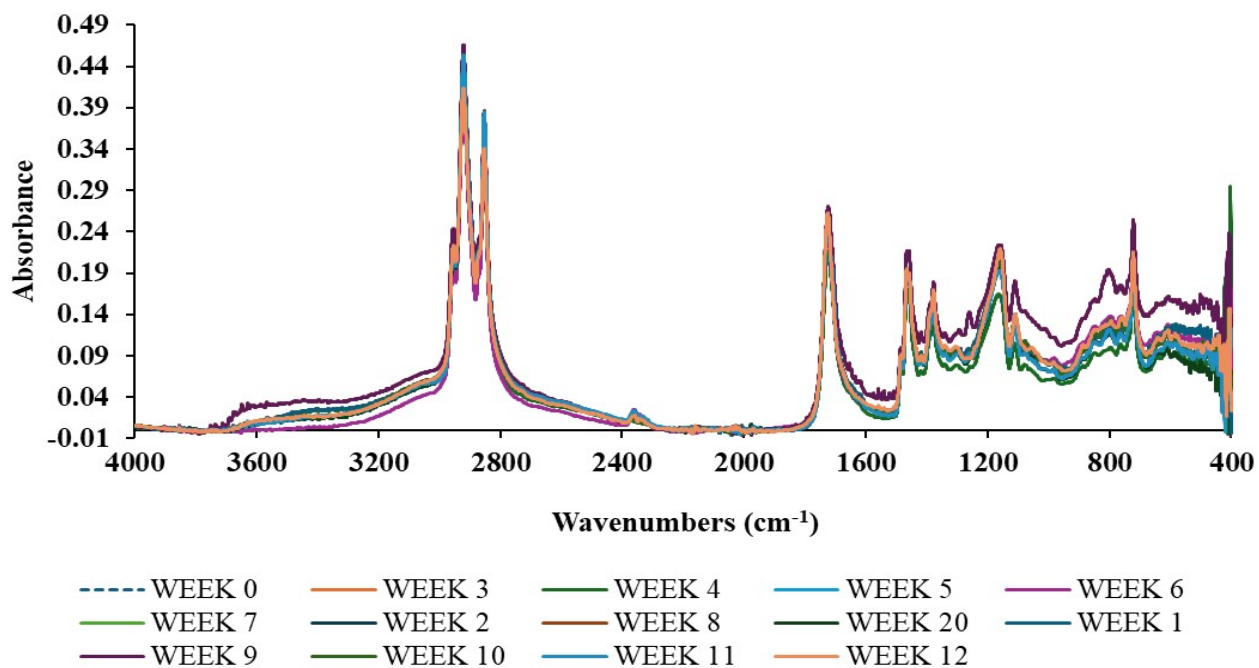

Figure S1(iv) – FT-IR for TOAB: dodecanoic acid (Week 1-12 and week 20)

**TGA CURVE (THY + DECANOIC ACID  
(1:1))**

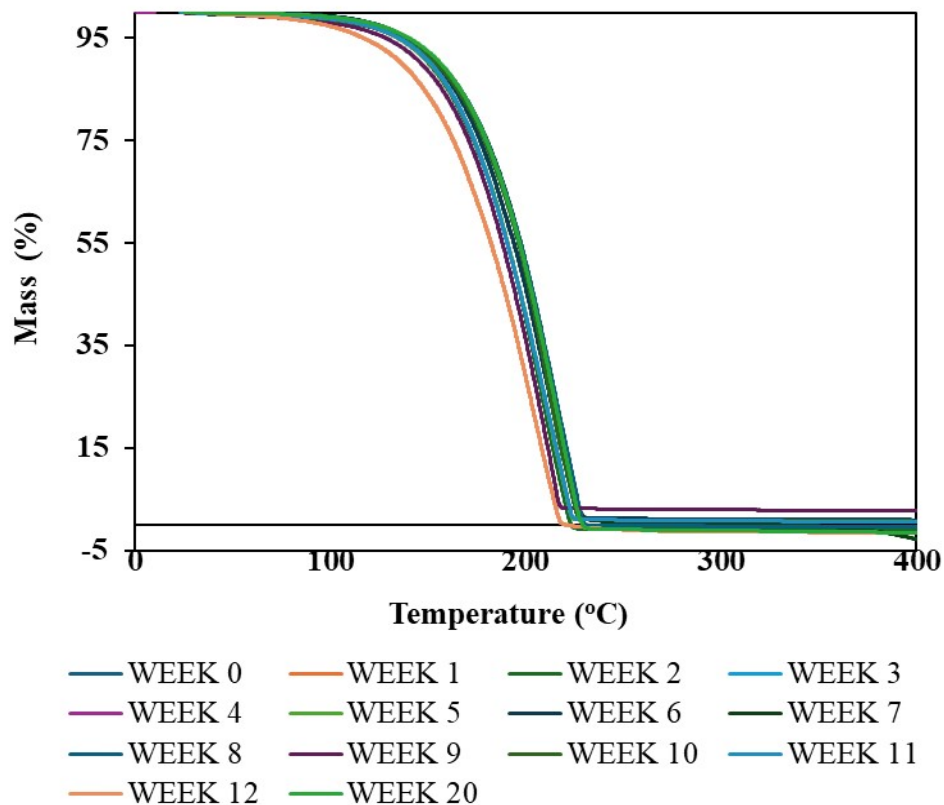

Figure S2(i) – TGA for Thy: Decanoic Acid (Week 1-12 and week 20)

**TGA CURVE (THY + DODECANOIC ACID  
(1:1))**

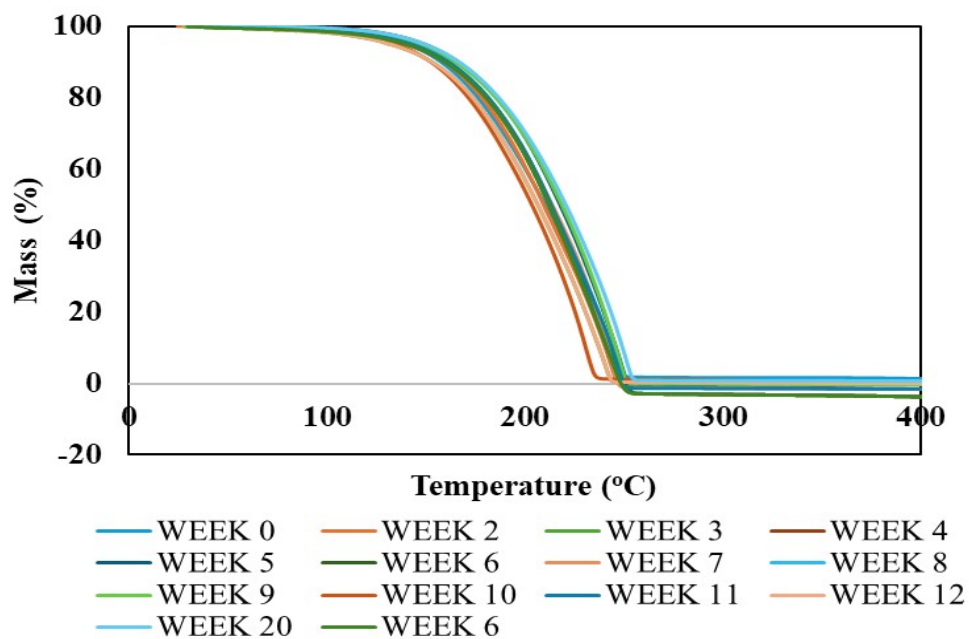

Figure S2(ii) – TGA for Thy: Dodecanoic Acid (Week 1-12 and week 20)

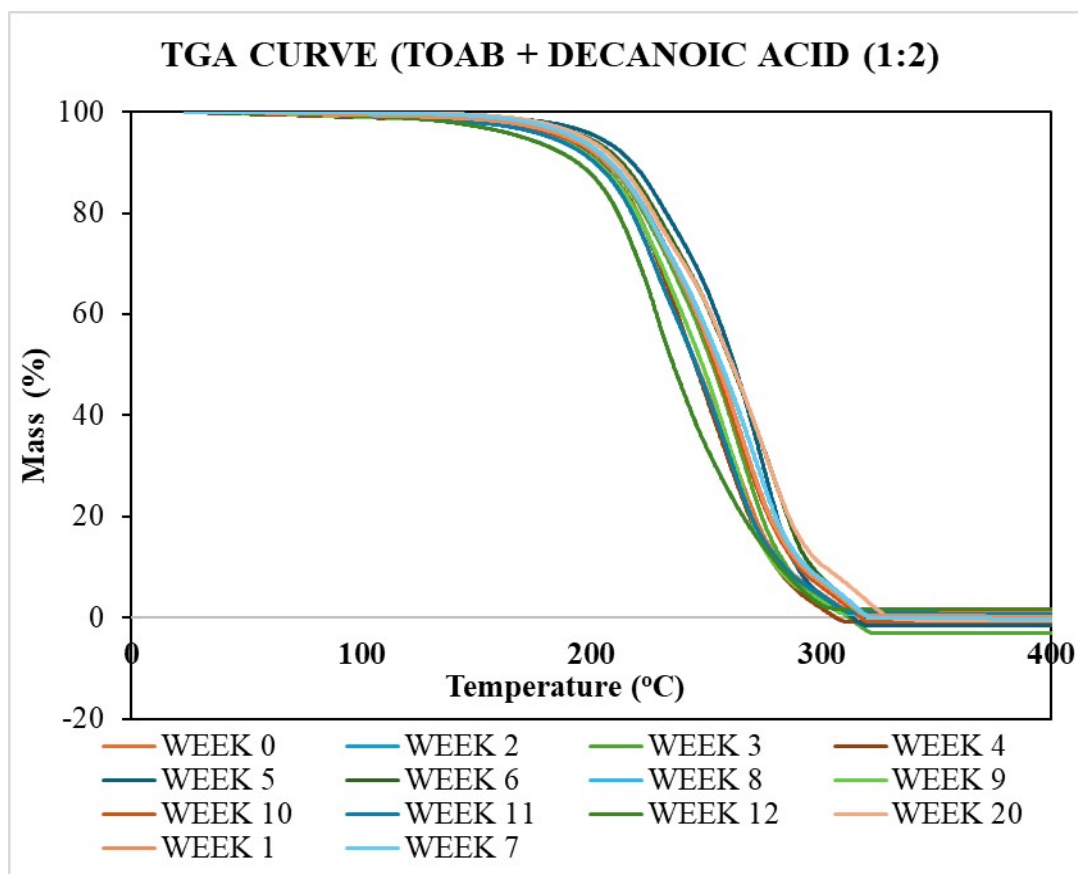

Figure S2(iii) – TGA for TOAB: Decanoic Acid (Week 1-12 and week 20)

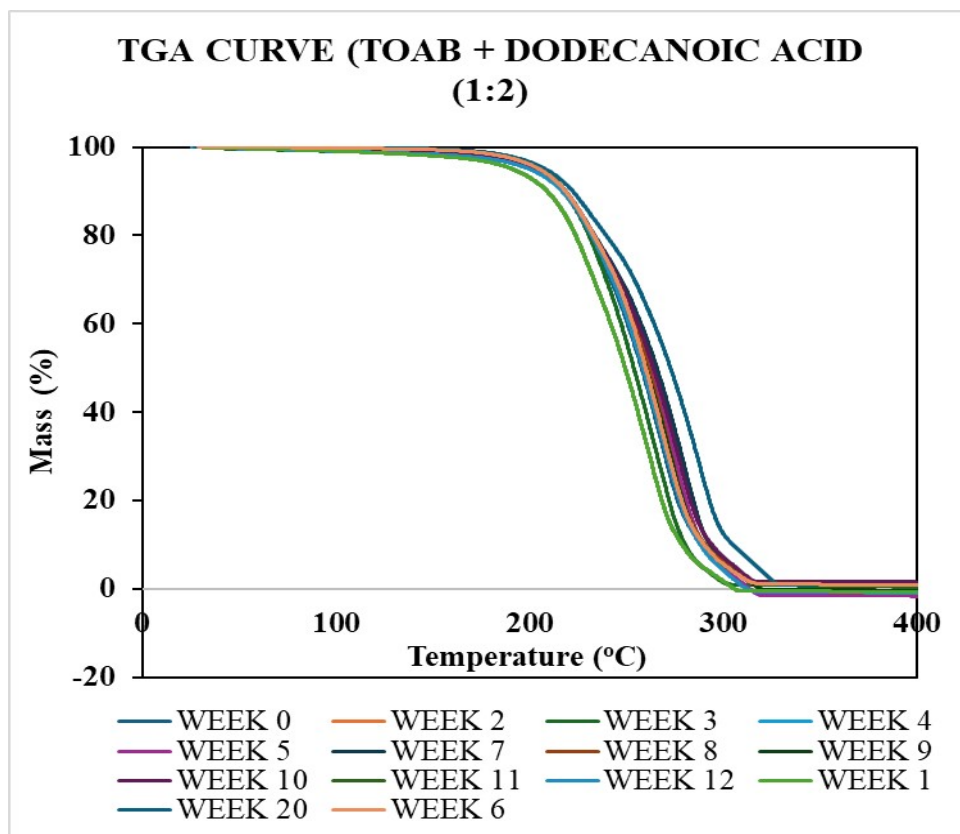

Figure S2(iv) – TGA for TOAB: Decanoic Acid (Week 1-12 and week 20)

**DSC Thermograms for Thymol :Decanoic Acid from Week 0 -  
Week 20**

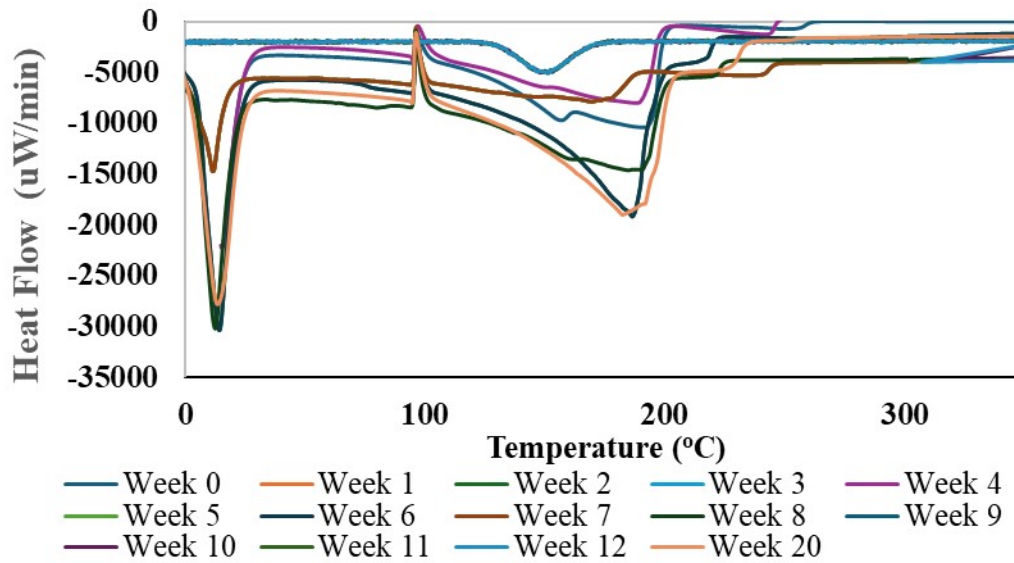

Figure S3(i) – DSC thermograms for Thymol: Decanoic Acid(Week 1-12 and week 20)

**DSC Thermograms for Thymol :Dodecanoic Acid from  
Week 0 -Week 20**

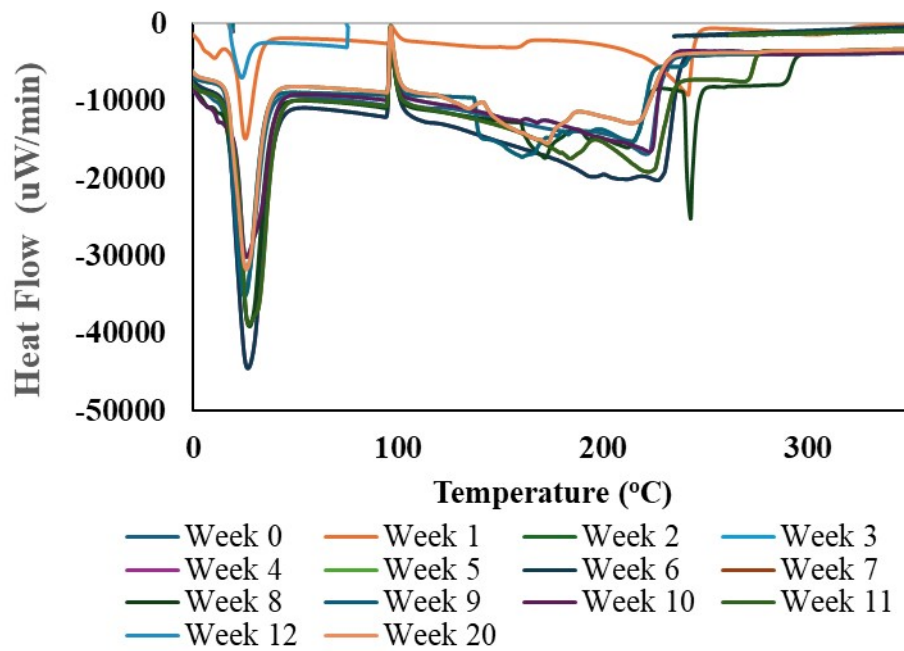

Figure S3(ii) – DSC thermograms for Thymol: Dodecanoic Acid(Week 1-12 and week 20)

**DSC Thermograms for TOAB :Decanoic Acid from Week 0 -Week 20**

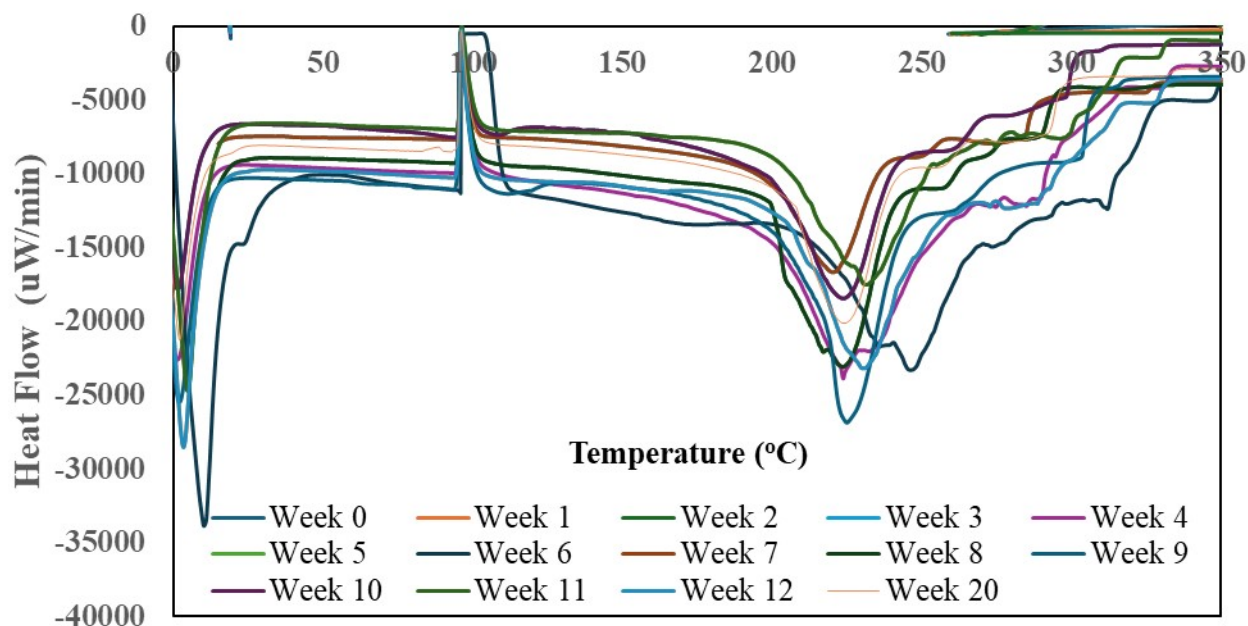

Figure S3(iii) – DSC thermograms for TOAB: Decanoic Acid(Week 1-12 and week 20)

**DSC Thermograms for TOAB :Dodecanoic Acid from Week 0 -Week 20**

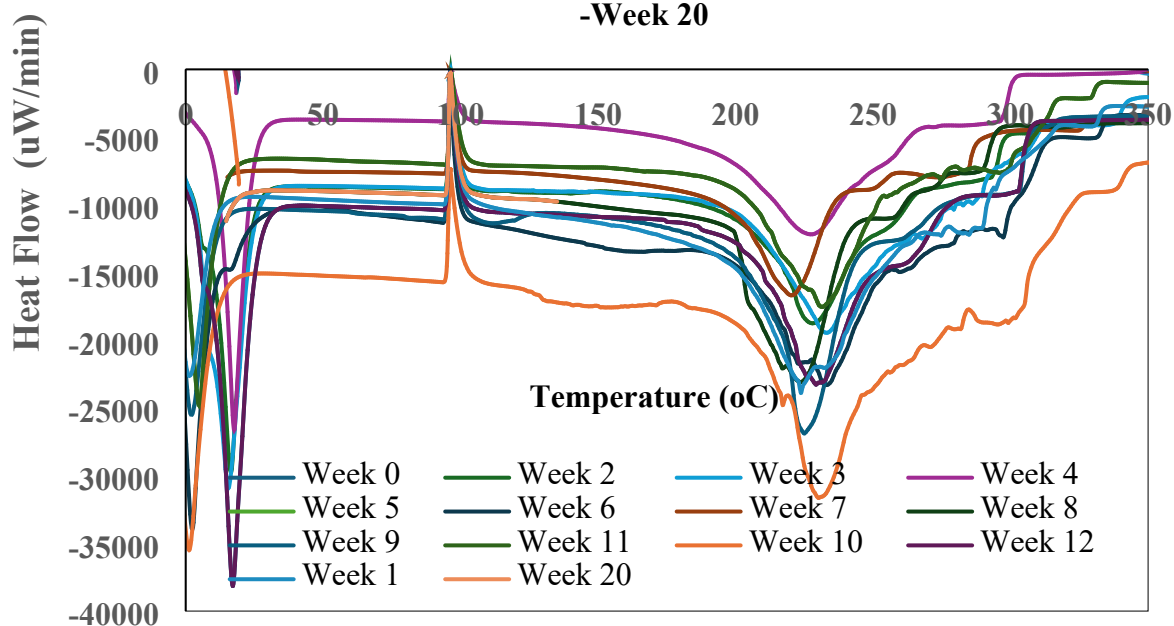

Figure S3(iv) – DSC thermograms for TOAB: Dodecanoic Acid(Week 1-12 and week 20)

Table S1: Eutectic melt temperatures derived from the DSC thermograms of the DES and thermodynamic data for Thymol: Decanoic Acid (week 1-12 and week 20)

| Week | $g^E/RT$ | Eutectic/Melting temperature (Kelvin) | $\ln(\gamma_{Thy})$ | $\gamma_{Thy}$ | $\ln(\gamma_{DA})$ | $\gamma_{DA}$ |
|------|----------|---------------------------------------|---------------------|----------------|--------------------|---------------|
| 0    | -1.1564  | 262.36                                | -1.205              | 0.2996         | -1.1079            | 0.3303        |
| 1    | -1.019   | 265.525                               | -1.084              | 0.338          | -0.9532            | 0.3855        |
| 2    | -1.15    | 262.51                                | -1.1993             | 0.3014         | -1.1005            | 0.3327        |
| 3    | -1.117   | 263.26                                | -1.1706             | 0.3102         | -1.064             | 0.3452        |
| 4    | -1.0633  | 264.495                               | -1.1236             | 0.3251         | -1.0031            | 0.3667        |
| 5    | -0.9969  | 266.041                               | -1.065              | 0.3446         | -0.9283            | 0.3952        |
| 6    | -1.1139  | 263.331                               | -1.1679             | 0.311          | -1.06              | 0.34645       |
| 7    | -1.1917  | 261.56                                | -1.2359             | 0.2906         | -1.1475            | 0.3174        |
| 8    | -1.1094  | 263.435                               | -1.1639             | 0.3123         | -1.0549            | 0.3482        |
| 9    | -1.1634  | 262.202                               | -1.2111             | 0.2979         | -1.1157            | 0.3277        |
| 10   | -1.0033  | 265.891                               | -1.071              | 0.3427         | -0.9356            | 0.3924        |
| 11   | -1.0976  | 263.706                               | -0.1535             | 0.3155         | -1.0416            | 0.3529        |
| 12   | -1.0568  | 264.646                               | -1.1179             | 0.327          | -0.9958            | 0.3694        |
| 20   | -1.3187  | 258.72                                | -1.347              | 0.26           | -1.2904            | 0.2752        |

Table S2: Eutectic melt temperatures derived from the DSC thermograms of the DES and thermodynamic data for Thymol: Dodecanoic Acid (week 1-12 and week 20).

| Week | $g^E/RT$ | Eutectic/Melting temperature (Kelvin) | $\ln(\gamma_{Thy})$ | $\gamma_{Thy}$ | $\ln(\gamma_{Do})$ | $\gamma_{Do}$ |
|------|----------|---------------------------------------|---------------------|----------------|--------------------|---------------|
| 0    | -1.2132  | 272.829                               | -0.8179             | 0.4414         | -1.6086            | 0.2002        |
| 1    | -1.3857  | 269.115                               | -0.9518             | 0.3860         | -1.8197            | 0.1621        |
| 2    | -1.3046  | 270.85                                | -0.8888             | 0.4112         | -1.7204            | 0.1790        |
| 3    | -1.2038  | 273.035                               | -0.8105             | 0.4446         | -1.5971            | 0.2025        |
| 4    | -1.2144  | 272.803                               | -0.8188             | 0.4410         | -1.6101            | 0.1999        |
| 5    | -1.2359  | 272.336                               | -0.8354             | 0.4337         | -1.6363            | 0.1947        |
| 6    | -1.3451  | 269.98                                | -0.9202             | 0.3984         | -1.7700            | 0.1703        |
| 7    | -1.2466  | 272.102                               | -0.8438             | 0.4300         | -1.6500            | 0.1922        |
| 8    | -1.2182  | 272.72                                | -0.8217             | 0.4400         | -1.6147            | 0.1990        |
| 9    | -1.2308  | 272.447                               | -0.8315             | 0.4354         | -1.6301            | 0.1960        |
| 10   | -1.3325  | 270.25                                | -0.9105             | 0.4023         | -1.7546            | 0.1730        |
| 11   | -1.3451  | 269.98                                | -0.9202             | 0.3984         | -1.7700            | 0.1703        |
| 12   | -1.3181  | 270.56                                | -0.8992             | 0.4069         | -1.7369            | 0.1761        |
| 20   | -1.2572  | 271.872                               | -0.8520             | 0.4266         | -1.6635            | 0.1897        |

Table S3: Eutectic melt temperatures derived from the DSC thermograms of the DES and thermodynamic data for TOAB Decanoic Acid (week 1-12 and week 20)

| Week | $g^E/RT$ | Eutectic/Melting temperature (Kelvin) | $\ln(\gamma_{TOAB})$ | $\gamma_{TOAB}$ | $\ln(\gamma_{DA})$ | $\gamma_{DA}$ |
|------|----------|---------------------------------------|----------------------|-----------------|--------------------|---------------|
| 0    | -2.3611  | 266.11                                | -4.6577              | 0.0095          | -1.2127            | 0.2974        |
| 1    | -2.2163  | 268.65                                | -4.4654              | 0.0115          | -1.0918            | 0.3356        |
| 2    | -2.1232  | 270.31                                | -4.3417              | 0.0130          | -1.0140            | 0.3628        |
| 3    | -2.0061  | 272.428                               | -4.1860              | 0.0152          | -0.9166            | 0.4000        |
| 4    | -2.3688  | 265.975                               | -4.6681              | 0.0094          | -1.2192            | 0.2955        |
| 5    | -2.1556  | 269.73                                | -4.3848              | 0.0125          | -1.0410            | 0.3531        |
| 6    | -2.0021  | 272.5                                 | -4.1808              | 0.0153          | -0.9128            | 0.4014        |
| 7    | -1.9967  | 272.598                               | -4.1736              | 0.0154          | -0.9083            | 0.4032        |
| 8    | -1.9731  | 273.029                               | -4.1423              | 0.0159          | -0.8889            | 0.4112        |
| 9    | -2.0279  | 272.031                               | -4.2150              | 0.0148          | -0.9343            | 0.3929        |
| 10   | -2.0743  | 271.19                                | -4.2768              | 0.0139          | -0.9731            | 0.3780        |
| 11   | -2.0241  | 272.1                                 | -4.2100              | 0.0149          | -0.9311            | 0.3941        |
| 12   | -1.9786  | 272.93                                | -4.1495              | 0.0158          | -0.8938            | 0.4094        |
| 20   | -2.0078  | 272.396                               | -4.1884              | 0.0152          | -0.9175            | 0.3995        |

Table S4: Eutectic melt temperatures derived from the DSC thermograms of the DES and thermodynamic data for TOAB: Dodecanoic Acid (week 1-12 and week 20).

| Week |         | Eutectic/Melting temperature (Kelvin) | $\ln(\gamma_{TOAB})$ | $\gamma_{TOAB}$ | $\ln(\gamma_{DA})$ | $\gamma_{DA}$ |
|------|---------|---------------------------------------|----------------------|-----------------|--------------------|---------------|
| 0    | -3.8429 | 254.75                                | -5.5647              | 0.0038          | -2.9819            | 0.0507        |
| 1    | -3.8633 | 254.46                                | -5.5900              | 0.0037          | -3.0006            | 0.0498        |
| 2    | -3.7676 | 255.82                                | -5.4759              | 0.0042          | -2.9134            | 0.0543        |
| 3    | -4.0444 | 251.93                                | -5.8026              | 0.003           | -3.1653            | 0.0422        |
| 4    | -3.7040 | 256.73                                | -5.4009              | 0.0045          | -2.8556            | 0.0575        |
| 5    | -3.8641 | 254.45                                | -5.5600              | 0.0037          | -3.0012            | 0.0497        |
| 6    | -3.8016 | 255.34                                | -5.5156              | 0.0040          | -2.9441            | 0.0527        |
| 7    | -3.9983 | 252.57                                | -5.7481              | 0.0032          | -3.1233            | 0.0440        |
| 8    | -3.6762 | 257.13                                | -5.3681              | 0.0047          | -2.8303            | 0.0560        |
| 9    | -3.7047 | 256.72                                | -5.4017              | 0.0045          | -2.8562            | 0.0575        |
| 10   | -3.8202 | 255.07                                | -5.5380              | 0.0039          | -2.9614            | 0.0517        |
| 11   | -3.7179 | 256.53                                | -5.4173              | 0.0044          | -2.8682            | 0.0568        |
| 12   | -3.8139 | 255.16                                | -5.5306              | 0.0040          | -2.9556            | 0.0521        |
| 20   | -3.7739 | 255.73                                | -5.4833              | 0.0042          | -2.9191            | 0.0540        |
